# Supplementary material
Source: publisher site journal article supplement (https://www.spandidos-publications.com/5425/downloadSupplementary)

Figure S1. Changes in the weight (A) of internal organs and morphology of livers (B) in mice receiving WG12399C and WG12592A. Mice were treated with the following total doses divided into four weekly intravenous injections: WG12399C at 18, 35 and 50 mg/kg; WG12592A at 1, 2 and 4 mg/kg. Data are expressed as the mean  $\pm$  SD, n=5. (B) Representative images of livers with any histological changes are shown.

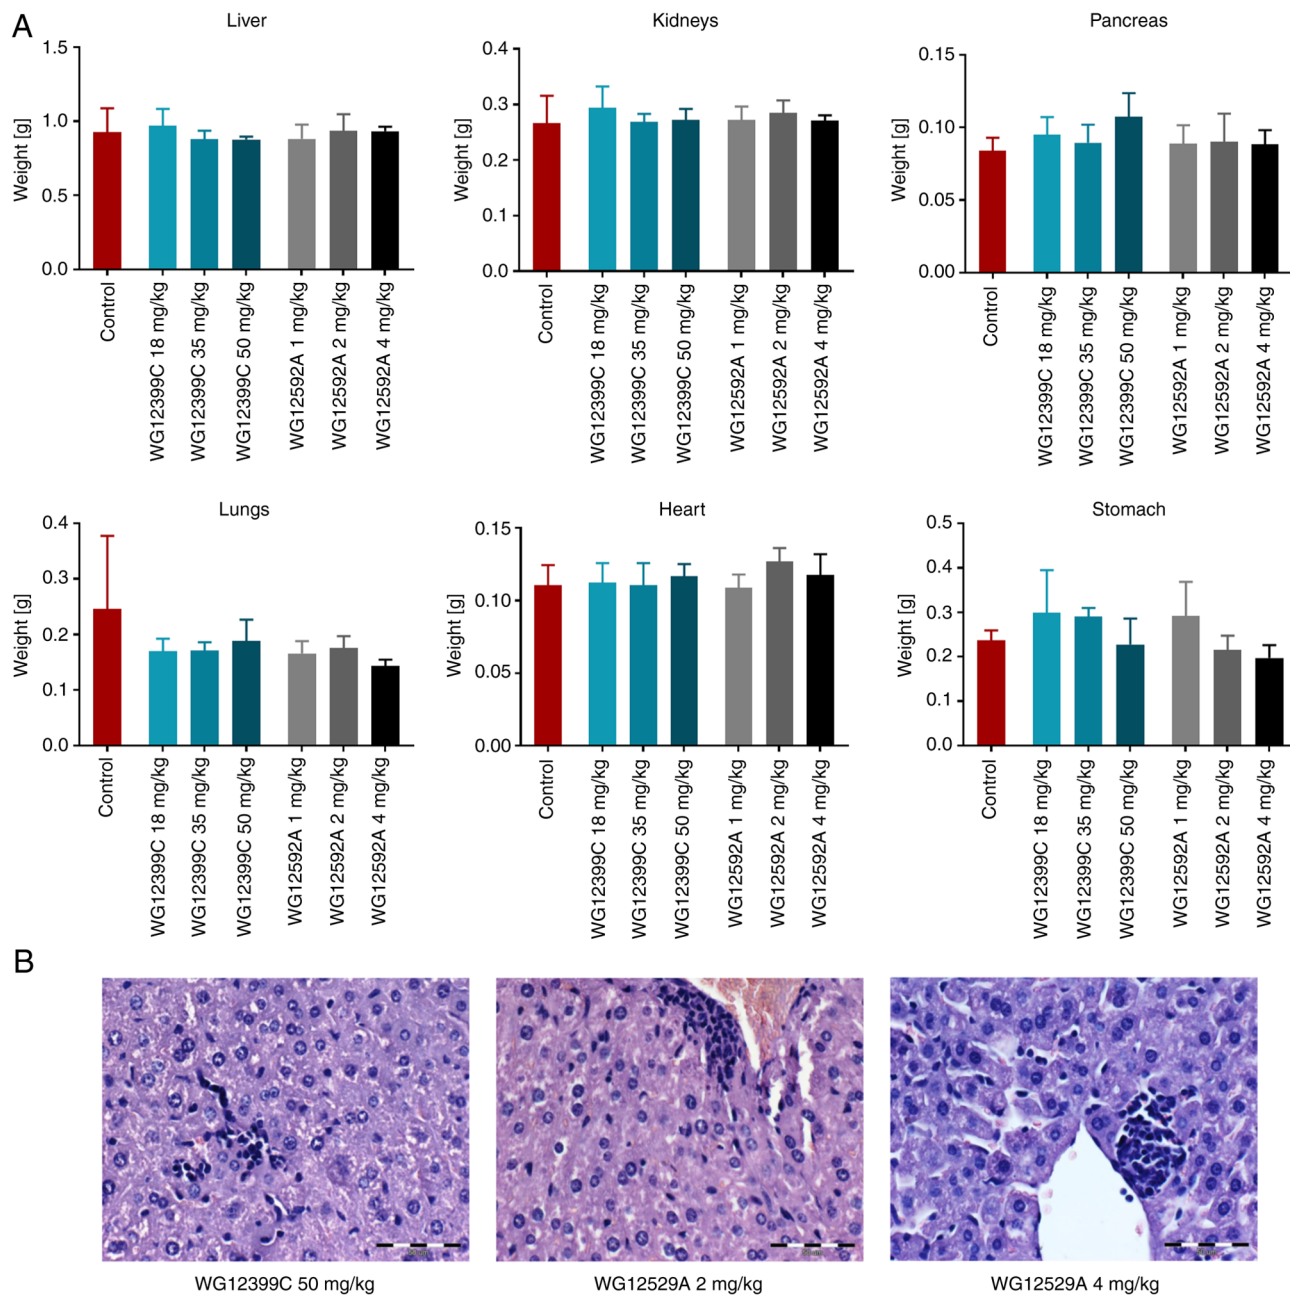

Figure S2. Morphological parameters of blood in mice receiving WG12399C and WG12592A. Mice were treated with the following total doses divided into four weekly intravenous injections: WG12399C at 18, 35 and 50 mg/kg; WG12592A at 1, 2 and 4 mg/kg. Data are expressed as the mean  $\pm$  SD, n=5. \*P<0.05, assessed using one-way ANOVA with Dunnett's multiple comparison tests.

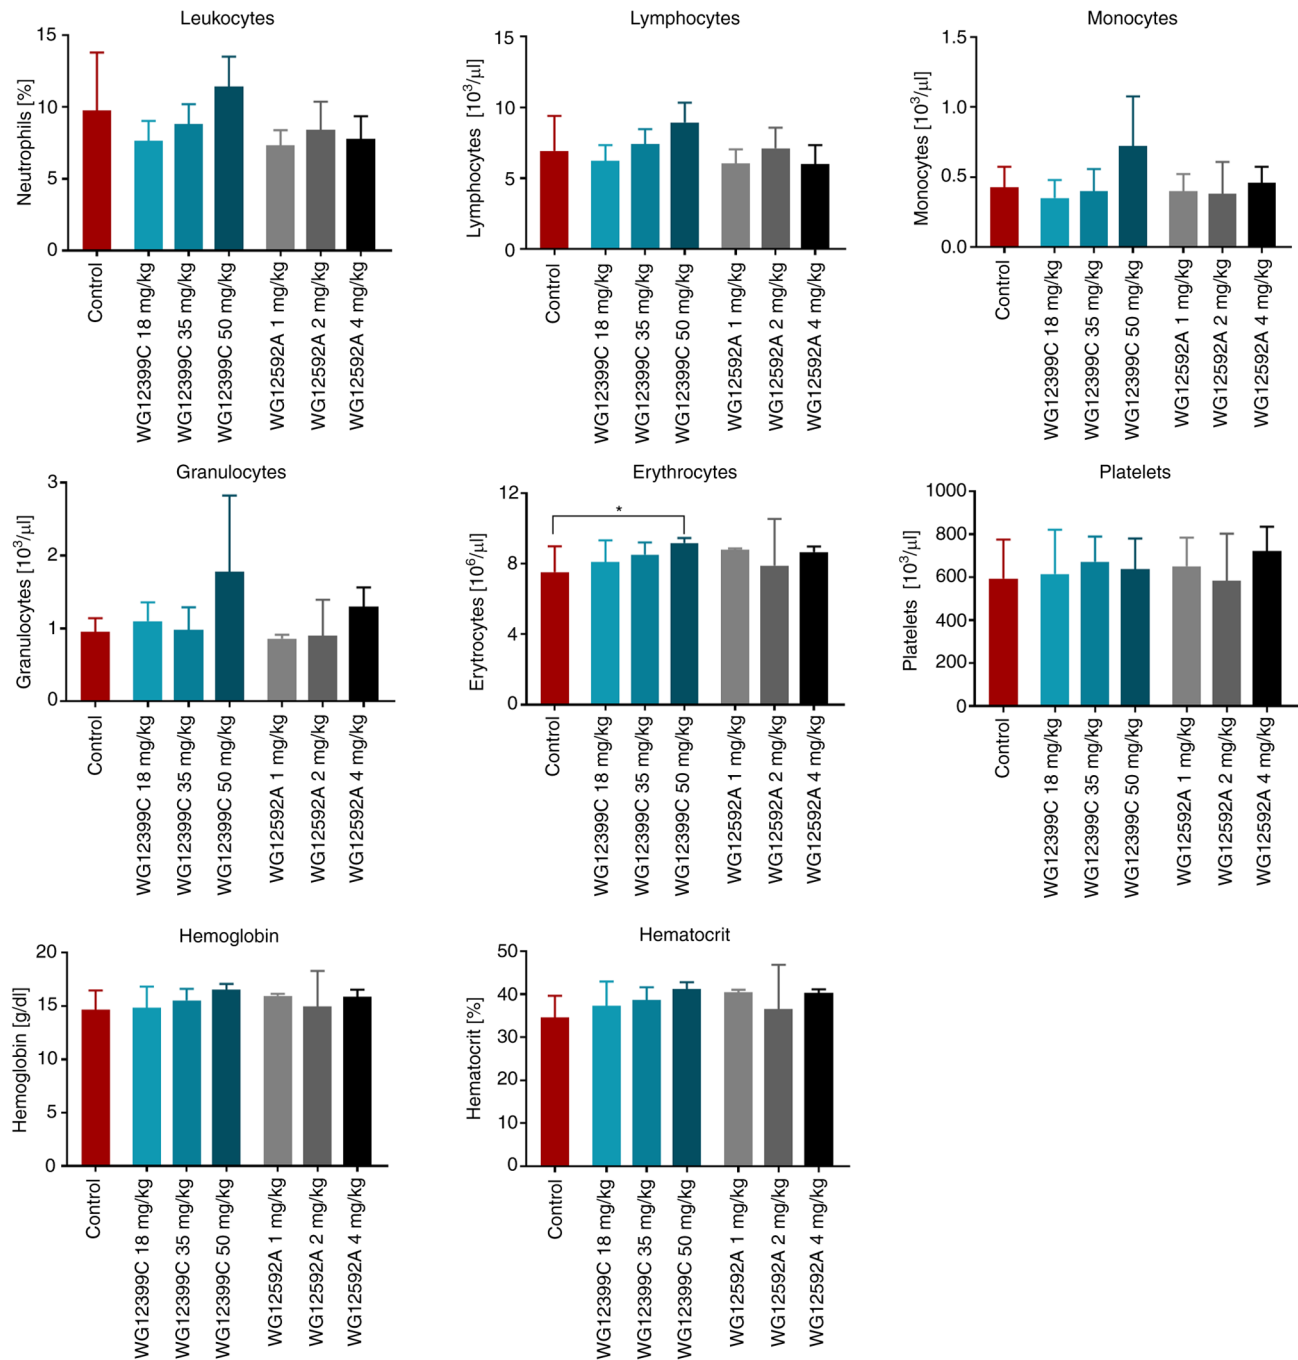

Figure S3. Weight of the internal organs of mice inoculated intracardially with of 4T1-luc2-tdTomato cells and treated with bisphosphonates; n=11-13 mice per group. Data presented as the mean  $\pm$  SD. \*P<0.05 and \*\*\*P<0.001 vs.cyclophosphamide, assessed using the Kruskal-Wallis test with Dunn's multiple comparisons tests.CY, cyclophosphamide.

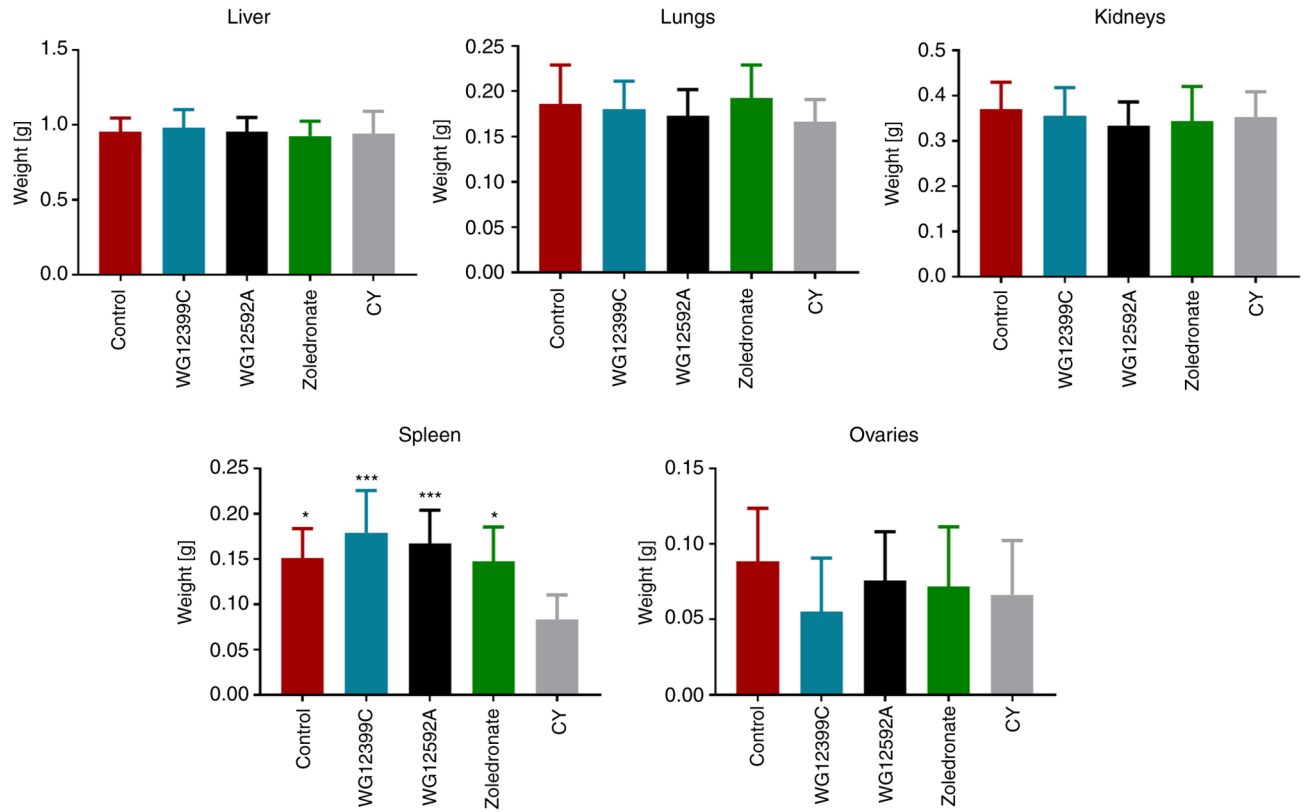

Supplement: Supplementary file 1 [file downloadSupplementary]
